# Supplementary material for: Common intermediates and kinetics, but different energetics, in the assembly of SNARE proteins
Source: eLife journal article supplement (doi:10.7554/elife.03348), 2014-09-01
Supplement: supp [file elife-03348-supp-v1.zip]

**Neuron:** SX1-Sp1-SNAP25-Sp2-Vamp2  
**GLUT4:** SX4-Sp1-SNAP23-Sp2-Vamp2  
**Endosome:** SX13-Sp1-VtiA-Sp3-SX6-Sp2-Vamp4  
**Yeast:** Sso1-Sp1-SEC9-Sp2-Snc2

|                          | -7 | -6 | -5 | -4 | -3 | -2 | -1 | 0 | 1 | 2 | 3 | 4 | 5 | 6 | 7 | +8 | LD |   |   |   |   |   |   |   |   |   |   |   |   |   |   |   |   |   |   |   |   |   |   |   |   |   |   |   |   |   |   |   |   |   |   |   |   |   |   |   |   |   |   |   |   |   |   |   |   |   |   |   |   |   |   |   |   |   |   |   |   |   |   |   |   |   |   |   |   |   |
|--------------------------|----|----|----|----|----|----|----|---|---|---|---|---|---|---|---|----|----|---|---|---|---|---|---|---|---|---|---|---|---|---|---|---|---|---|---|---|---|---|---|---|---|---|---|---|---|---|---|---|---|---|---|---|---|---|---|---|---|---|---|---|---|---|---|---|---|---|---|---|---|---|---|---|---|---|---|---|---|---|---|---|---|---|---|---|---|---|
| <b>SX1 (181-233) :</b>   | I  | I  | M  | D  | S  | S  | I  | S | K | Q | A | L | S | E | I | E  | T  | R | H | S | E | I | I | K | L | E | N | S | I | R | E | L | H | D | M | F | M | D | M | A | M | L | V | E | S | Q | G | E | M | I | D | R | I | E | Y | N | V | E | H | A | V | D | V | E | R | A | V | S | D | T | K | K | A | V | K | Y | Q | S | K | A | R |   |   |   |   |   |
| <b>SX4 (189-270) :</b>   | I  | L  | K  | D  | T  | Q  | T  | R | Q | A | L | N | E | I | S | A  | R  | H | S | E | I | Q | Q | L | E | R | T | I | R | E | L | H | E | I | F | T | F | L | A | T | E | V | E | M | Q | G | E | M | I | N | R | I | E | K | N | I | L | S | A | D | Y | V | E | R | G | Q | E | H | V | K | I | A | L | E | N | Q | K | K | A | R |   |   |   |   |   |   |
| <b>SX13 (167-248) :</b>  | Q  | E  | E  | E  | A  | A  | I  | T | E | Q | D | L | E | L | I | K  | E  | R | E | T | A | I | Q | Q | L | E | A | D | I | L | D | V | N | Q | I | F | K | D | L | A | M | M | I | H | D | Q | G | D | L | I | S | I | E | A | N | V | E | S | E | V | H | E | R | A | S | D | Q | L | Q | R | A | A | Y | Q | K | K | S | R |   |   |   |   |   |   |   |   |
| <b>Sso1 (177-260) :</b>  | L  | L  | N  | A  | N  | R  | R  | G | E | A | K | T | A | L | E | A  | V  | Q | A | R | H | Q | E | L | L | K | L | E | K | S | M | A | E | L | T | Q | L | F | N | D | M | E | E | L | V | I | E | Q | Q | E | N | V | D | V | I | D | K | N | V | E | D | A | Q | L | D | V | E | Q | G | V | G | H | T | D | K | A | V | K | S | A | R | K | A | R |   |   |
| <b>Sp1 :</b>             | G  | G  | S  | N  | R  | S  | G  | G | S | D | S | G | G | S | C | Q  | G  | S | S | G | A | G | G | S | L | N | S | K | S | S | G | G | S | G | S | A | N | S | T | A | S | N | S | G | Q | G | S | G | G | I | E | G | L | S | G |   |   |   |   |   |   |   |   |   |   |   |   |   |   |   |   |   |   |   |   |   |   |   |   |   |   |   |   |   |   |   |
| <b>Sp1 :</b>             | G  | G  | S  | N  | R  | C  | G  | G | S | D | S | G | G | S | Q | G  | S  | S | G | A | G | G | S | L | N | S | K | S | S | G | G | S | G | S | A | N | S | T | A | S | N | S | G | Q | G | S | G | G | I | E | G | L | S | G |   |   |   |   |   |   |   |   |   |   |   |   |   |   |   |   |   |   |   |   |   |   |   |   |   |   |   |   |   |   |   |   |
| <b>Sp1 :</b>             | G  | G  | S  | N  | R  | S  | G  | G | S | D | S | G | G | S | C | Q  | G  | S | S | G | A | G | G | S | L | N | S | K | S | S | G | G | S | G | S | A | N | S | T | A | S | N | S | G | Q | G | S | G | G | I | E | G | L | S | G |   |   |   |   |   |   |   |   |   |   |   |   |   |   |   |   |   |   |   |   |   |   |   |   |   |   |   |   |   |   |   |
| <b>Sp1 :</b>             | G  | G  | S  | N  | R  | S  | G  | G | S | D | S | G | G | S | C | Q  | G  | S | S | G | A | G | G | S | L | N | S | K | S | S | G | G | S | G | S | A | N | S | T | A | S | N | S | G | Q | G | S | G | G | I | E | G | L | S | G |   |   |   |   |   |   |   |   |   |   |   |   |   |   |   |   |   |   |   |   |   |   |   |   |   |   |   |   |   |   |   |
| <b>SN25N (1-83) :</b>    | M  | A  | E  | D  | A  | D  | M  | R | N | E | L | E | E | M | Q | R  | R  | A | D | Q | L | A | D | E | S | L | E | S | T | R | R | M | L | Q | L | V | E | E | S | K | D | A | G | I | R | T | L | V | M | L | D | E | Q | Q | E | Q | L | E | R | I | E | E | G | M | D | Q | I | N | K | D | M | K | E | A | E | K | N | L | T | D | L | G | K |   |   |   |
| <b>SN23N (1-78) :</b>    | M  | D  | D  | L  | S  | P  | E  | E | I | Q | L | R | A | H | Q | V  | T  | D | E | S | L | E | S | T | R | R | I | L | G | L | A | I | E | S | Q | D | A | G | I | K | T | I | T | M | L | D | E | Q | Q | E | Q | L | N | R | I | E | E | G | M | D | Q | I | N | K | D | M | R | E | A | E | K | T | L | T | E | L | N | K |   |   |   |   |   |   |   |   |
| <b>VtiA (111-199) :</b>  | S  | E  | N  | Q  | L  | I  | K  | L | R | E | E | R | A | H | L | L  | D  | N | T | E | R | L | E | R | S | S | R | L | E | A | G | Y | Q | I | A | V | E | T | E | Q | I | Q | E | M | L | N | L | S | H | D | R | E | R | I | Q | R | A | R | E | R | L | R | E | T | D | A | N | L | G | K | S | S | R | I | L | T | G | M | L | R | R | I | I | Q | N | R |
| <b>SEC9N (421-498) :</b> | E  | E  | D  | E  | A  | V  | D  | E | I | K | Q | E | I | K | F | T  | K  | Q | S | S | V | A | T | R | N | T | L | K | M | A | Q | A | E | R | A | G | M | T | L | G | M | L | G | H | Q | S | E | Q | L | N | N | V | E | G | N | L | D | L | M | K | V | N | K | V | A | D | E | K | V | A | E | L | K | K |   |   |   |   |   |   |   |   |   |   |   |   |
| <b>SN25 (84-138) :</b>   | F  | S  | G  | L  | S  | V  | S  | P | S | N | K | L | K | S | S | D  | A  | Y | K | K | A | W | G | N | N | Q | D | G | V | V | A | S | Q | P | A | R | V | V | D | E | R | E | Q | M | A | I | S | G | G | F | I | R | R | V | T |   |   |   |   |   |   |   |   |   |   |   |   |   |   |   |   |   |   |   |   |   |   |   |   |   |   |   |   |   |   |   |
| <b>SN23 (79-143) :</b>   | S  | S  | G  | L  | S  | V  | S  | P | N | R | T | K | N | F | E | S  | G  | K | N | Y | K | A | T | W | G | D | G | D | S | S | P | S | N | V | V | S | K | Q | P | S | R | I | T | N | G | P | Q | T | T | G | A | S | G | G | Y | I | K | R | I | T |   |   |   |   |   |   |   |   |   |   |   |   |   |   |   |   |   |   |   |   |   |   |   |   |   |   |
| <b>Sp3 :</b>             | G  | S  | L  | N  | S  | K  | S  | A | G | S | G | S | G | S | V | S  | P  | S | N | K | L | K | S | S | D | A | Y | K | K | A | W | G | N | N | Q | D | G | V | V | A | S | Q | S | G | A | N | S | G | G | L | K | G | Q | S | S | G |   |   |   |   |   |   |   |   |   |   |   |   |   |   |   |   |   |   |   |   |   |   |   |   |   |   |   |   |   |   |
| <b>SEC9 (499-587) :</b>  | L  | N  | R  | S  | I  | L  | A  | V | H | V | S | N | P | F | N | S  | K  | R | R | R | R | E | R | E | E | Q | L | K | N | R | K | I | E | E | K | L | M | R | E | Q | T | S | Q | L | S | Q | S | T | Q | R | I | E | G | A | M | N | A | N | N | I | S | E | V | R | E | R | Y | Q | R | K | N | V | L | E | K | A | K | R | Y | Q | F | E | N | D | E |   |
| <b>SN25C (139-206) :</b> | N  | D  | A  | R  | E  | N  | E  | M | D | E | N | L | E | Q | V | S  | G  | I | G | N | L | R | H | M | A | L | D | M | G | N | E | I | D | T | Q | N | R | Q | I | D | R | I | E | M | E | K | A | D | S | N | K | T | R | I | D | E | A | N | Q | R | A | T | K | M | L | G | S | G |   |   |   |   |   |   |   |   |   |   |   |   |   |   |   |   |   |   |
| <b>SN23C (144-210) :</b> | N  | D  | A  | R  | E  | D  | E  | M | E | E | N | L | T | Q | V | S  | G  | I | L | G | N | L | K | N | M | A | L | D | M | G | N | E | I | D | A | Q | N | Q | I | Q | K | I | T | E | K | A | D | T | N | K | N | R | I | D | I | A | N | T | R | A | K | K | L | I | D | S |   |   |   |   |   |   |   |   |   |   |   |   |   |   |   |   |   |   |   |   |
| <b>SX6 (159-234) :</b>   | Q  | A  | Q  | Q  | L  | I  | V  | E | Q | D | E | Q | L | E | L | V  | S  | G | I | G | V | L | K | N | M | S | Q | R | I | G | G | E | L | E | E | Q | A | V | M | L | E | D | F | S | H | E | L | E | S | T | Q | S | R | L | D | N | V | M | K | L | A | K | V | S | H | M | T | S | D | R | R | Q |   |   |   |   |   |   |   |   |   |   |   |   |   |   |
| <b>SEC9C (588-651) :</b> | D  | E  | M  | E  | L  | E  | I  | D | R | N | L | D | Q | I | Q | V  | S  | N | R | L | K | K | M | A | L | T | G | K | E | L | D | S | Q | Q | K | R | L | N | N | I | E | E | S | T | D | D | L | D | I | N | L | H | M | T | N | R | L | A | G | I | R |   |   |   |   |   |   |   |   |   |   |   |   |   |   |   |   |   |   |   |   |   |   |   |   |   |
| <b>Sp2 :</b>             | S  | G  | G  | S  | N  | R  | G  | G | S | D | S | G | G | S | G | G  | I  | E | G | L | G | G | S | S | G | A | S | G | G | L | K | N | S | G | S | G | S | G | S | N | A | S | N | S | G | Q | G | S | S | G | G |   |   |   |   |   |   |   |   |   |   |   |   |   |   |   |   |   |   |   |   |   |   |   |   |   |   |   |   |   |   |   |   |   |   |   |
| <b>Sp2 :</b>             | G  | S  | G  | S  | N  | R  | G  | G | S | D | S | G | G | S | G | G  | I  | E | G | L | G | G | S | S | G | A | S | G | G | L | K | N | S | G | S | G | S | G | S | N | A | S | N | S | G | Q | G | S | S | G | G |   |   |   |   |   |   |   |   |   |   |   |   |   |   |   |   |   |   |   |   |   |   |   |   |   |   |   |   |   |   |   |   |   |   |   |
| <b>Sp2 :</b>             | S  | G  | G  | S  | N  | R  | G  | G | S | D | S | G | G | S | G | G  | I  | E | G | L | G | G | S | S | G | A | S | G | G | L | K | N | S | G | S | G | S | G | S | N | A | S | N | S | G | Q | G | S | S | G | G |   |   |   |   |   |   |   |   |   |   |   |   |   |   |   |   |   |   |   |   |   |   |   |   |   |   |   |   |   |   |   |   |   |   |   |
| <b>Sp2 :</b>             | S  | G  | S  | G  | S  | N  | R  | G | G | S | D | S | G | G | S | G  | G  | I | E | G | L | G | G | S | S | G | A | S | G | G | L | K | N | S | G | S | G | S | G | S | N | A | S | N | S | G | Q | G | S | S | G | G |   |   |   |   |   |   |   |   |   |   |   |   |   |   |   |   |   |   |   |   |   |   |   |   |   |   |   |   |   |   |   |   |   |   |
| <b>VAMP2 (25-96) :</b>   | N  | L  | T  | S  | N  | R  | L  | Q | T | Q | A | V | D | E | V | V  | D  | I | M | R | V | N | V | D | K | V | L | E | R | D | Q | K | L | S | E | L | D | D | R | A | D | A | L | Q | A | G | A | S | Q | F | E | T | S | A | A | K | L | K | R | K | Y | W | W | K | N | L | K | M | M |   |   |   |   |   |   |   |   |   |   |   |   |   |   |   |   |   |
| <b>Vamp4 (46-117) :</b>  | F  | G  | P  | R  | N  | D  | K  | I | K | H | V | Q | N | V | D | E  | V  | I | D | M | Q | E | N | I | T | K | V | I | E | R | G | E | R | L | D | L | Q | D | K | S | E | S | L | S | D | N | A | T | A | F | S | N | R | S | K | Q | L | R | R | Q | M | W | W | R | G | S | K | I | K |   |   |   |   |   |   |   |   |   |   |   |   |   |   |   |   |   |
| <b>Snc2 (21-93) :</b>    | N  | P  | N  | S  | Q  | N  | K  | T | A | A | L | R | Q | E | I | D  | D  | T | V | G | I | M | R | D | N | I | N | K | V | A | E | R | G | E | R | L | T | S | I | E | D | K | A | D | N | L | A | I | S | A | Q | G | F | K | R | G | A | N | R | V | R | K | Q | M | W | W | K | D | L | K | M | R | M |   |   |   |   |   |   |   |   |   |   |   |   |   |
| <b>Cter :</b>            | G  | S  | G  | G  | S  | G  | S  | G | L | N | D | I | F | E | A | Q  | K  | I | E | W | H | E |   |   |   |   |   |   |   |   |   |   |   |   |   |   |   |   |   |   |   |   |   |   |   |   |   |   |   |   |   |   |   |   |   |   |   |   |   |   |   |   |   |   |   |   |   |   |   |   |   |   |   |   |   |   |   |   |   |   |   |   |   |   |   |   |
