# Supplementary material for: Common intermediates and kinetics, but different energetics, in the assembly of SNARE proteins
Source: eLife journal article supplement (doi:10.7554/elife.03348), 2014-09-01
Supplement: supp [file energy_landscape.xlsx]

## Sheet: Sheet1
state number	aa relative ionic layer	contour length (a.a.)	hard core size	Free energy	alternative energy
fully folded state	39	0	1	-65	-65
LD transition state	32	14	1	-52	-62
LD unfolded state	29	20	1	-57	-57
Vc transition state	19	30	2	-36.3	-54
half-zippered state	0	49	4.4	-29	-29
NTD transition state	-10	60	5.9	10	10
fully unfolded state	-24	101	3.8	0	0
