# Supplementary figures and images for: Common intermediates and kinetics, but different energetics, in the assembly of SNARE proteins
Source: eLife journal article supplement (doi:10.7554/elife.03348), 2014-09-01

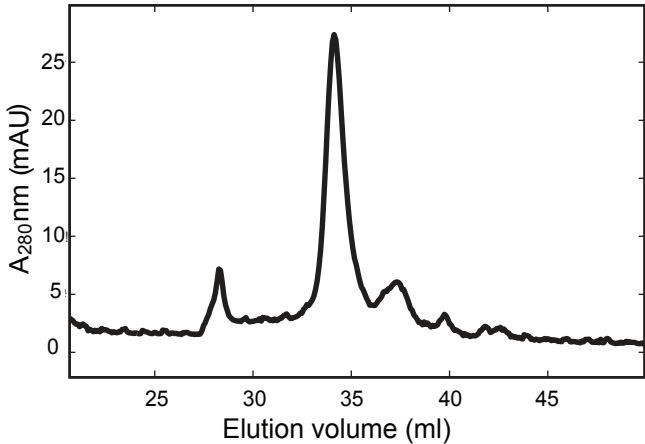

Supplement: supp [file elife-03348-supp-v1.zip]

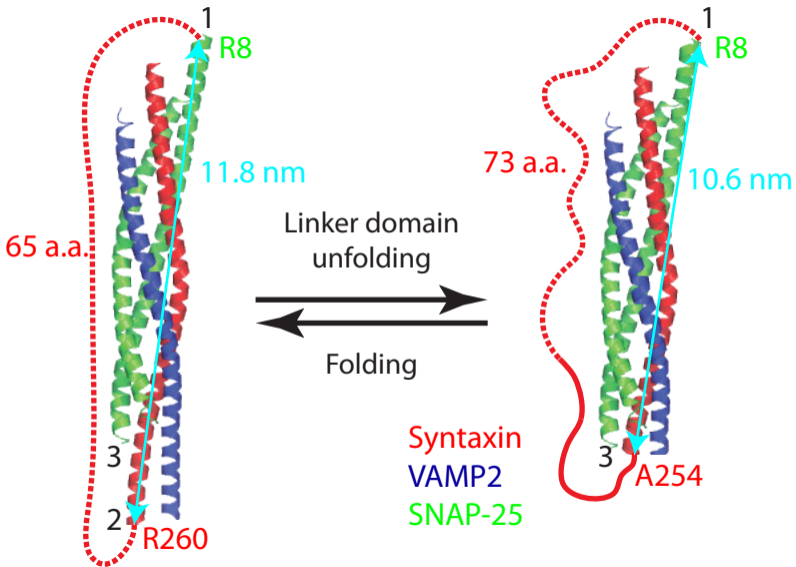

Supplement: supp [file elife-03348-supp-v1.zip]

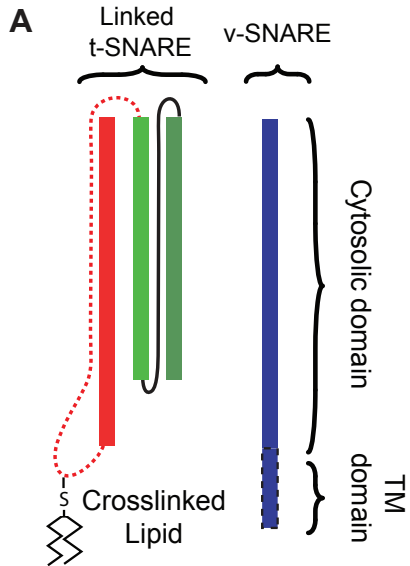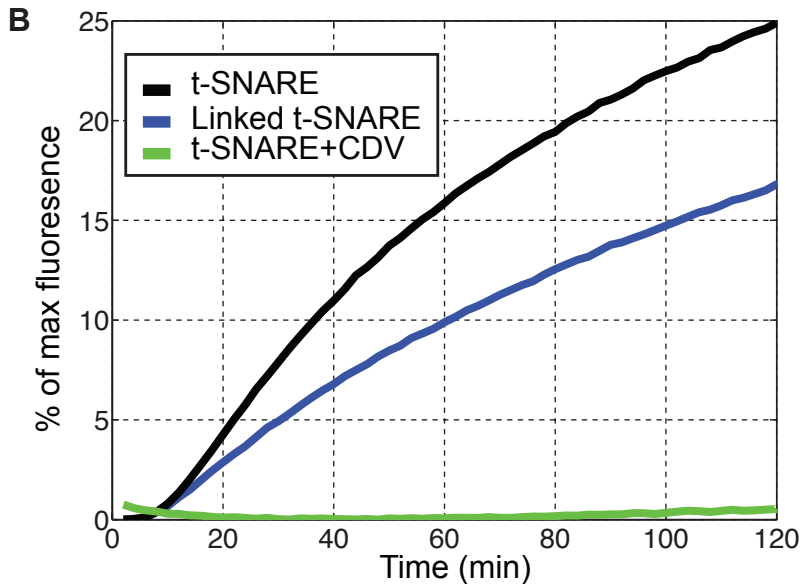

Supplement: supp [file elife-03348-supp-v1.zip]

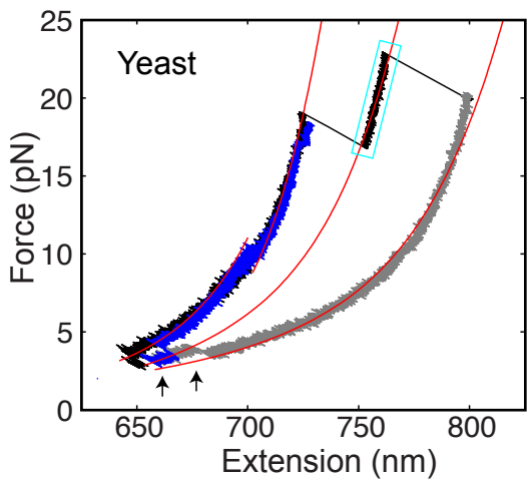

Supplement: supp [file elife-03348-supp-v1.zip]

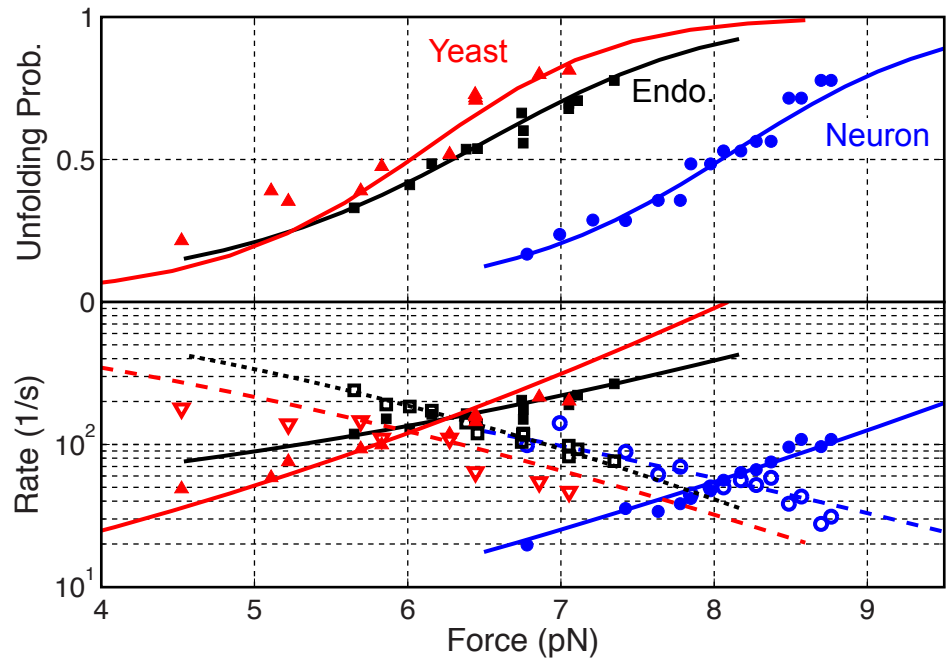

Supplement: supp [file elife-03348-supp-v1.zip]

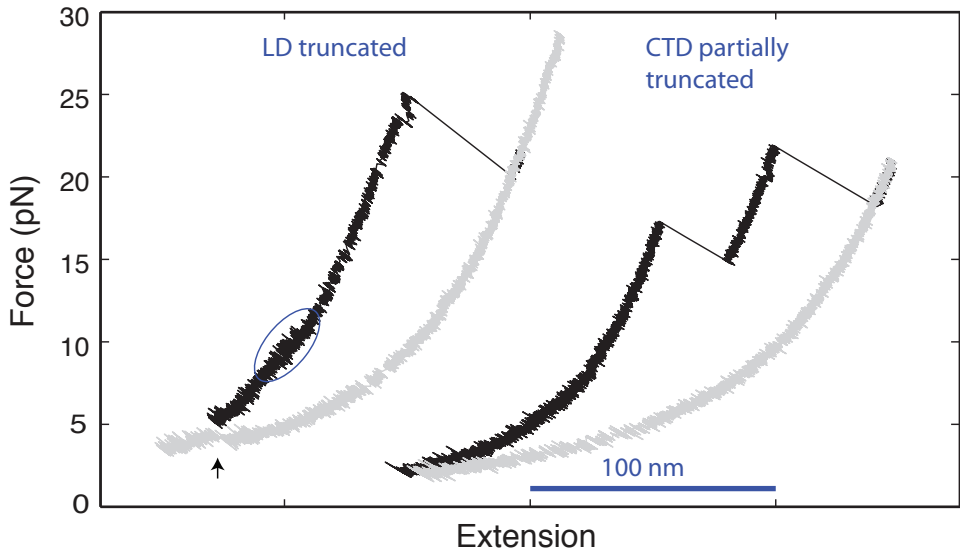

Supplement: supp [file elife-03348-supp-v1.zip]

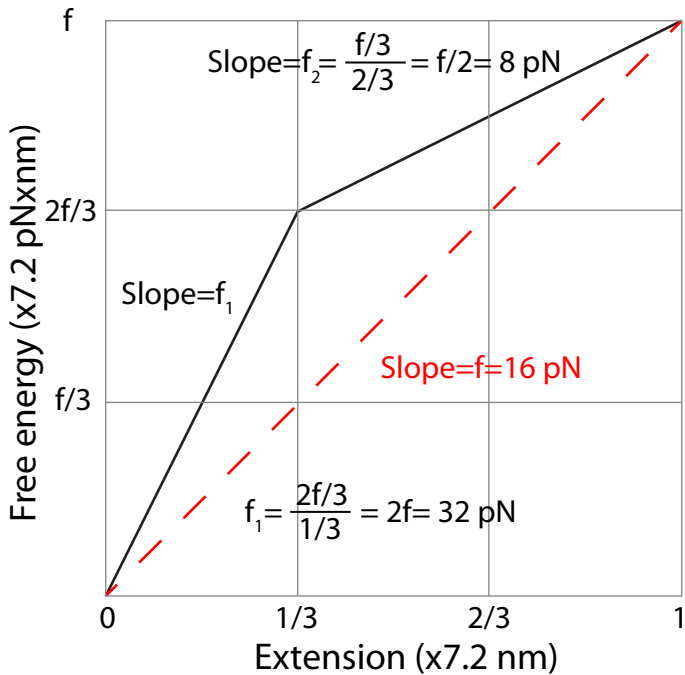

Supplement: supp [file elife-03348-supp-v1.zip]

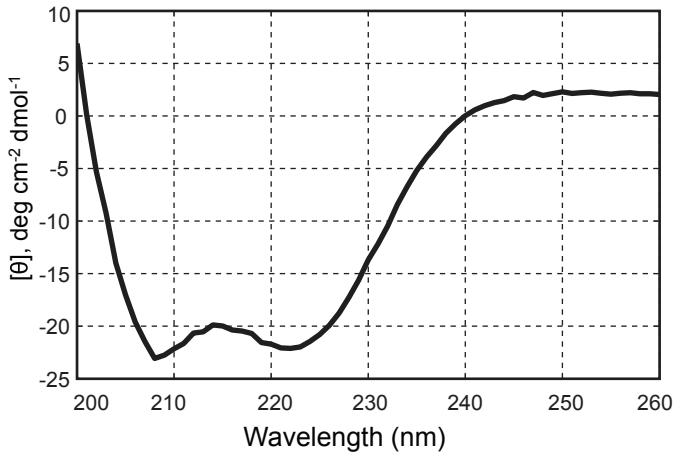

Supplement: supp [file elife-03348-supp-v1.zip]

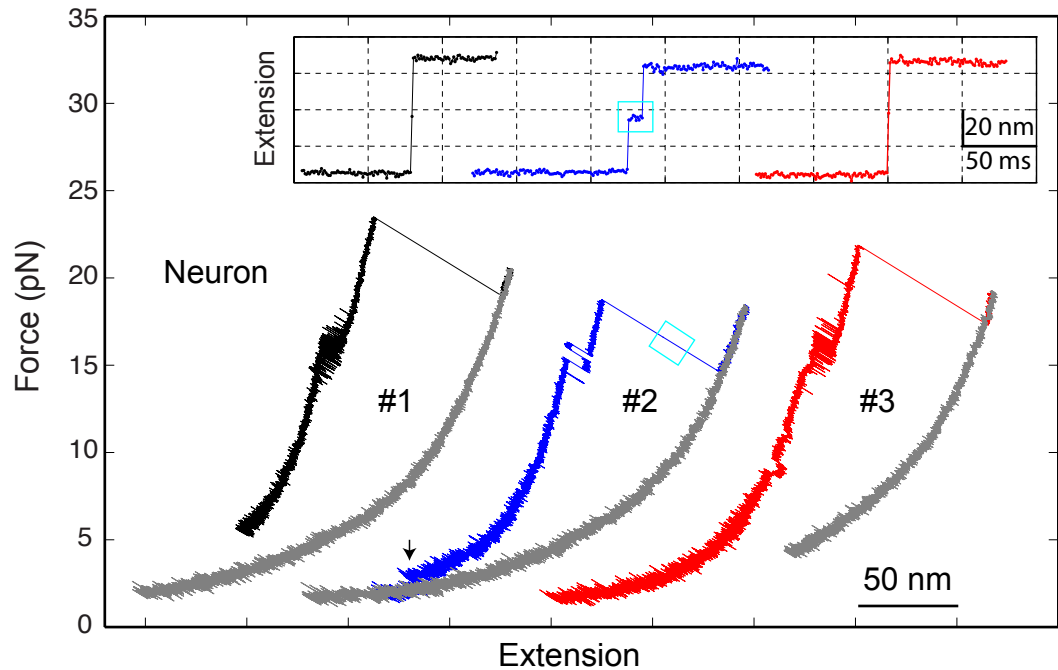

Supplement: supp [file elife-03348-supp-v1.zip]

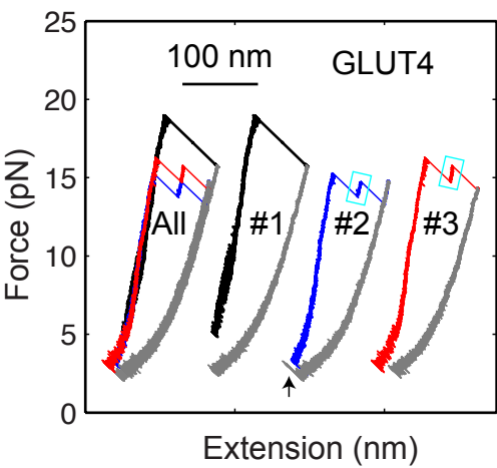

Supplement: supp [file elife-03348-supp-v1.zip]
